# Supplementary material
Source: Research Square preprint supplement (doi:10.21203/rs.3.rs-9747940/v1)
Supplement: Supplementary file 1 [file 7dccb92944b3d501ed7d3e18.docx]

**Supplementary file 2: Participant characteristics**

**Table S1. Characteristics of South Asian men with long-term conditions (n=17).**

| **Participant ID** | **Self-identified ethnicity** | **Age (years)** | **Index LTC** | **Comorbidities** | **Educational attainment** | **Occupation** | **Religion** | **Years in UK** | **Generational status** |
| --- | --- | --- | --- | --- | --- | --- | --- | --- | --- |
| SA01 | Pakistani | 60 | Diabetes type 2 | None reported | College | Taxi driver | Islam | 42 | First |
| SA02 | Pakistani | 54 | Diabetes type 2 and coronary heart disease | None reported | College | IT consultant | Islam | 51 | First |
| SA03 | Indian | 62 | Diabetes type 2 | None reported | University | Operations manager | Islam | 55 | First |
| SA04 | Indian | 67 | Diabetes type 2 | None reported | No schooling | Retired factory worker | Islam | 22 | First |
| SA05 | Pakistani | 60 | Coronary heart disease | Hypercholesterolaemia, prediabetes | University | IT consultant | Islam | 50 | First |
| SA06 | Pakistani | 39 | Diabetes type 2 | None reported | University | Unemployed | Islam | Born in UK | Second |
| SA07 | Bangladeshi | 42 | Diabetes type 1 | Hypercholesterolaemia, hypertension | College | Security worker | Islam | 40 | Second |
| SA08 | Pakistani | 57 | Diabetes type 2 and coronary heart disease | Hypercholesterolaemia, hypertension | Secondary school | Factory worker | Islam | 45 | First |
| SA09 | Bangladeshi | 33 | Diabetes type 2 | Asthma | University | Teacher | Islam | 32 | Second |
| SA10 | Bangladeshi | 37 | Diabetes type 2 | Paranoid schizophrenia | University | Unemployed | Islam | 26 | First |
| SA11 | Pakistani | 83 | Diabetes type 2 and coronary heart disease | Osteoarthritis | Secondary school | Retired travel agent | Islam | 60 | First |
| SA12 | Pakistani | 50 | Diabetes and coronary heart disease | None reported | University | Post office and taxi work | Islam | 25 | First |
| SA13 | British Pakistani | 66 | Diabetes type 2 and coronary heart disease | None reported | O Levels (GCSEs) | Businessman | Islam | 52 | First |
| SA14 | British Pakistani | 62 | Diabetes type 2 | Partial blindness | College | Off work on sick leave (previously taxi driver and recovery truck) | Islam | 35 | First |
| SA15 | Indian | 63 | Diabetes type 2 | Dystonia | Secondary school (O Levels not completed) | Post office manager | Hinduism | 22 | First |
| SA16 | Pakistani | 62 | Diabetes type 2 | Hypercholesterolaemia | Secondary school (not completed) | Shopkeeper | Islam | 31 | First |
| SA17 | Bangladeshi | 30 | Diabetes type 1 | None reported | College | Underwriter | Islam | Born in UK | Second |

*LTC = long-term condition. For participants who provided their year of arrival in the UK rather than duration of residence, years in UK have been calculated as of 2021 (the mid-point of the data collection period).*

**Table S2. Characteristics of general practitioner participants (n=18).**

| **Participant ID** | **Age (years)** | **Gender** | **Self-identified ethnicity** | **SA languages spoken** | **Clinical sessions per week** | **Years experience as GP** | **Roles** |
| --- | --- | --- | --- | --- | --- | --- | --- |
| GP01 | 64 | Male | Indian | Gujarati | 3 | 32 | Partner; academia |
| GP02 | 40 | Male | Pakistani | Punjabi, Urdu | 3 | 11 | Partner; leadership |
| GP03 | 55 | Male | English | Nil | 4 | 29 | Salaried; medical education |
| GP04 | 39 | Male | Pakistani | Urdu, Punjabi | 6 | 10 | Partner; medical education |
| GP05 | 50 | Male | Pakistani | Urdu | 9 | 20 | Partner; leadership |
| GP06 | 38 | Male | Indian | Gujarati | 6.5 | 11 | Partner; medical education |
| GP07 | 43 | Male | Pakistani | Urdu, Pashto | 6 | 8 | Salaried; other clinical roles, medical education |
| GP08 | 33 | Male | Pakistani | Urdu, Punjabi | 6 | 4 | Partner; medical education |
| GP09 | 32 | Female | English | Nil | 4 | 2.5 | Salaried; academia, medical education |
| GP10 | 44 | Male | Bangladeshi | Bengali | 3.5 | 16 | Partner; leadership, medical education |
| GP11 | 38 | Female | Indian | Nil | 6.5 | 6.5 | Salaried |
| GP12 | 42 | Male | Pakistani | Urdu, Punjabi, Hindko | 8 | 5 | Salaried (and locum); medical education |
| GP13 | 30 | Female | Indian | Tamil | 10 | 1 | Partner |
| GP14 | 33 | Male | Indian | Hindi | 2 | 4.5 | Salaried; other clinical roles |
| GP15 | 49 | Male | Pakistani | Urdu | 7.5 | 18 | Salaried; other clinical roles |
| GP16 | 45 | Male | Bangladeshi | Bengali | 9 | 16 | Partner; leadership |
| GP17 | 49 | Female | Pakistani | Urdu | 6 | 7 | Salaried; other clinical roles |
| GP18 | 31 | Male | Bangladeshi | Bengali | 6 | 3 | Salaried; leadership |

*GP = general practitioner; SA = South Asian.*
