# Supplementary material
Source: Research Square preprint supplement (doi:10.21203/rs.3.rs-9747940/v1)
Supplement: Supplementary file 2 [file e74ec955586411fafdef1ee6.docx]

**Supplementary file 1: Topic guides**

**Topic guide for men of South Asian origin with diabetes and/or coronary heart disease**

**Welcome**

- Explanation of the study.
- Do you have any questions?
- Record written consent prior to the start of the interview on two consent forms, one for the interviewer and one for the interviewee. If consent is not given to digitally record, then explain that I will take notes.
- Confirm contact details.

**Demographics**

- Age
- Ethnicity
- Long-term condition(s), including date of diagnosis
- Educational attainment
- Occupation
- How long participant has resided in the UK
- Religion
- GP details
- Subjective classification of first, second or third generation South Asian in the UK

**Key prompts**

- Could you please tell me how you spend your time and with whom?
- What aspects of South Asian heritage are important to you?
- Can you tell me about your long-term condition and how it has impacted on your life?
- What do you understand by emotional distress? Is this something you have experienced in the context of your LTC?
- How is emotional distress perceived within your community?
- From whom and where might you seek help for emotional distress?
- What do you think is the treatment for emotional distress?
- Do you seek help differently for emotional and physical problems?
- Has the management of your long-term condition been affected by the COVID-19 pandemic?
- Has your mood been affected by the COVID-19 pandemic?
- Are there gaps in services, or other services you feel would better support yourself and other men of South Asian origin with LTCs with emotional distress?

**End of interview**

- Before we finish, is there anything further you would like to add?
- What is your take-home or main message to researchers trying to support men of SA origin with LTCs who experience emotional distress?
- Do you have any questions?
- Thank you.
- Would you like a summary of the results? If so, via email or post? This information will be kept in a separate password-protected document not linked to your interview.
- Next steps.

**Topic guide for general practitioners**

**Welcome**

- Explanation of the study.
- Do you have any questions?
- Record written consent prior to the start of the interview on two consent forms, one for the interviewer and one for the participant. If consent is not given to digitally record, then explain that I will take notes.
- Confirm contact details.

**Demographics**

- Age
- Gender
- Ethnicity
- Languages spoken
- Area working as a GP
- Number of clinical sessions worked per week
- Years of experience as a GP
- Role (partner or salaried, and any extra roles such as GPwSI or CCG role)

**Key prompts**

- Could you tell me about the demographics of the practice you work in?
- Tell me about your experience of the management of long-term conditions in men of South Asian (SA) origin.
- Do men of SA origin with LTCs seek help when they feel emotionally distressed? How do they present?
- How do you support these individuals?
- In your experience, what do men of SA origin with LTCs think causes their emotional distress?
- In your experience, what do men of SA origin with LTCs think is the treatment or cure for their emotional distress?
- How do you think emotional distress is perceived within the SA community?
- What, if any, help-seeking strategies do they use?
- Do they seek help differently for emotional and physical problems?
- What are the facilitators and barriers for clinicians in identifying and managing emotional distress in men of SA origin?
- Have men of SA origin with LTCs presented with emotional distress during the COVID-19 pandemic?
- How has the management of their long-term condition been affected by the COVID-19 pandemic?
- Are there gaps in services, or other services you feel would better support men of SA origin with LTCs with emotional distress?

**End of interview**

- Before we finish, is there anything further you would like to add?
- What is your take-home or main message to GPs supporting men of SA origin with LTCs who experience emotional distress?
- Do you have any questions?
- Thank you.
- Would you like a summary of the results? If so, via email or post? This information will be kept in a separate password-protected document not linked to your interview.
- Next steps.
